# Supplementary material for: Dual functional oyster shell-derived Ag/ZnO/CaCO3 nanocomposites with enhanced catalytic and antibacterial activities for water purification
Source: PubMed Central journal article supplement (PMC9076377; doi:10.1039/c9ra08960h), 2019-12-13
Supplement: RA-009-C9RA08960H-s001.pdf [file RA-009-C9RA08960H-s001.pdf]

## Supporting Information

### **Dual Functional Oyster Shell-derived Ag/ZnO/CaCO<sub>3</sub> Nanocomposites with Enhanced Catalytic and Antibacterial Activities for Water Purification**

**Lin Chang**<sup>a,b,§</sup>, **Yan Feng**<sup>a,b,§</sup>, **Xiaoyu Huang**<sup>a,b</sup>, **Youguang Lu**<sup>a,b\*</sup>, **Da-Peng Yang**<sup>c\*</sup>

<sup>a</sup> Department of Preventive Dentistry, School and Hospital of Stomatology, Fujian Medical University, Fuzhou 350002, Fujian Province, PR China.

<sup>b</sup> Key Laboratory of Stomatology & Fujian Provincial Engineering Research Center of Oral Biomaterial, School and Hospital of Stomatology, Fujian Medical University, Fuzhou 350004, Fujian Province, PR China.

<sup>c</sup> College of Chemical Engineering and Materials Science, Quanzhou Normal University, Quanzhou 362000, Fujian Province, PR China.

§ Equal contribution

\* Corresponding Authors:

Dr. Youguang Lu

Phone: +86-591-83736429; Fax: +86-591-83720599

Email address: [fjlyg63@163.com](mailto:fjlyg63@163.com)

Dr. Da-Peng Yang

Tel.: +86-595-22199816; fax: +86-595-22199816

E-mail address: [yangdp@qztc.edu.cn](mailto:yangdp@qztc.edu.cn)

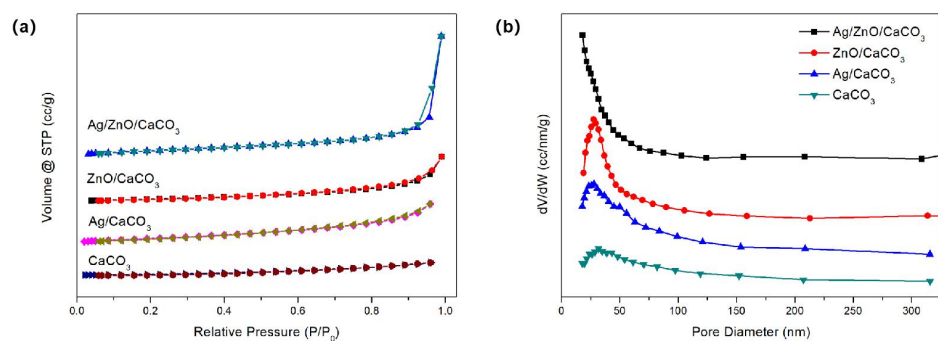

**Fig. S1.** N<sub>2</sub> adsorption-desorption isotherms (a) and pore size distribution (b) of CaCO<sub>3</sub>, Ag/CaCO<sub>3</sub>, ZnO/CaCO<sub>3</sub>, and Ag/ZnO/CaCO<sub>3</sub> nanocomposites.

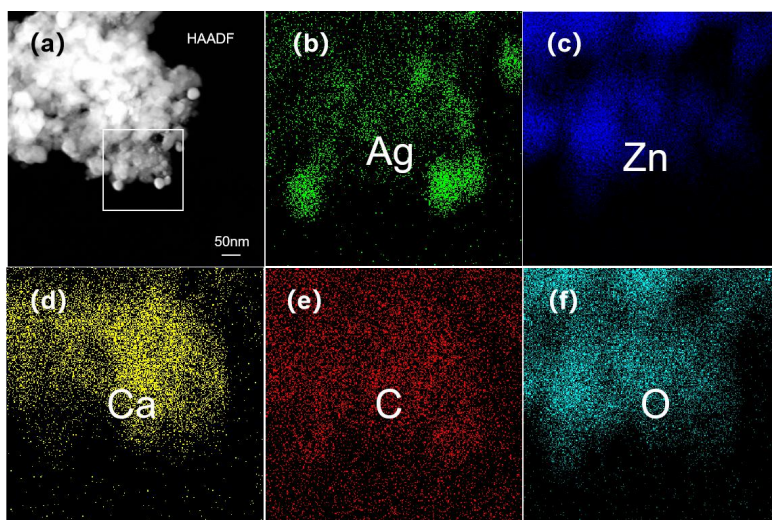

**Fig. S2.** TEM images of Ag/ZnO/CaCO<sub>3</sub> and corresponding elemental mapping images showing Ag, Zn, Ca, C and O in the selected area.
